# Supplementary figures and images for: A circulating reservoir of pathogenic-like CD4+ T cells shares a genetic and phenotypic signature with the inflamed synovial micro-environment
Source: PubMed Central journal article supplement — Ann Rheum Dis. 2014 Dec 12;75(2):459–65. doi: 10.1136/annrheumdis-2014-206226 (PMC4752664; doi:10.1136/annrheumdis-2014-206226), 2014-12-12

# Figure S1

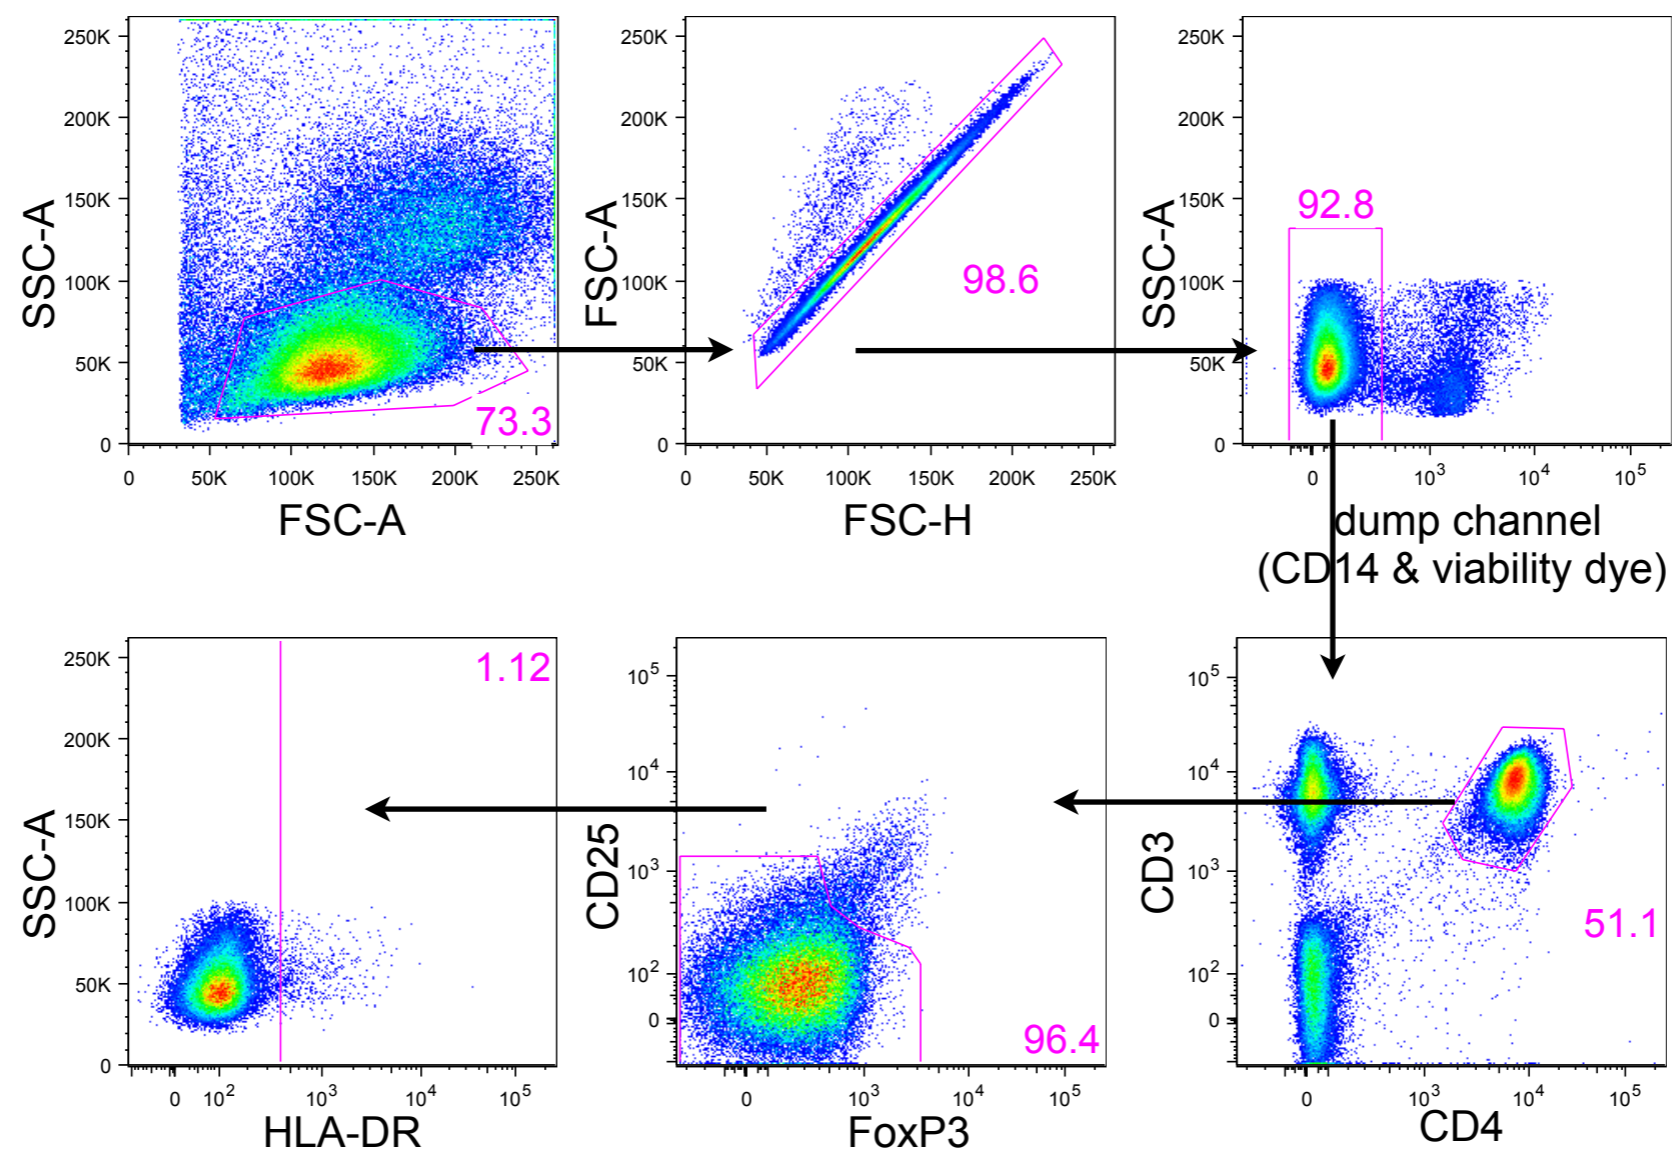

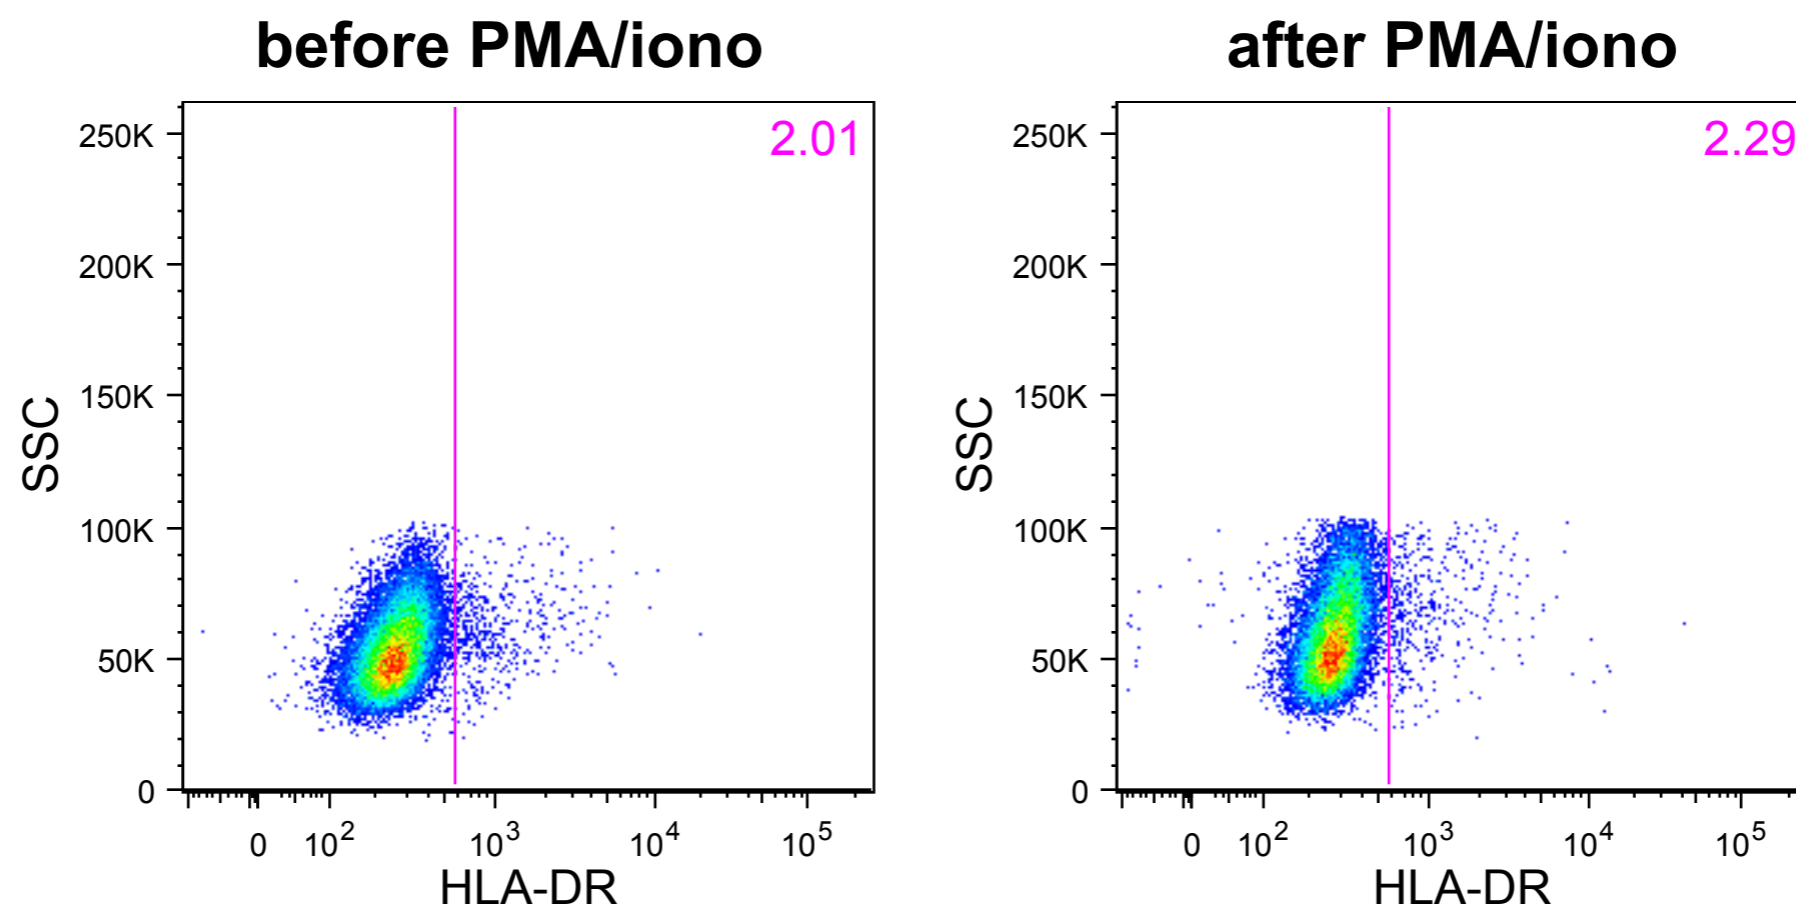

**A**

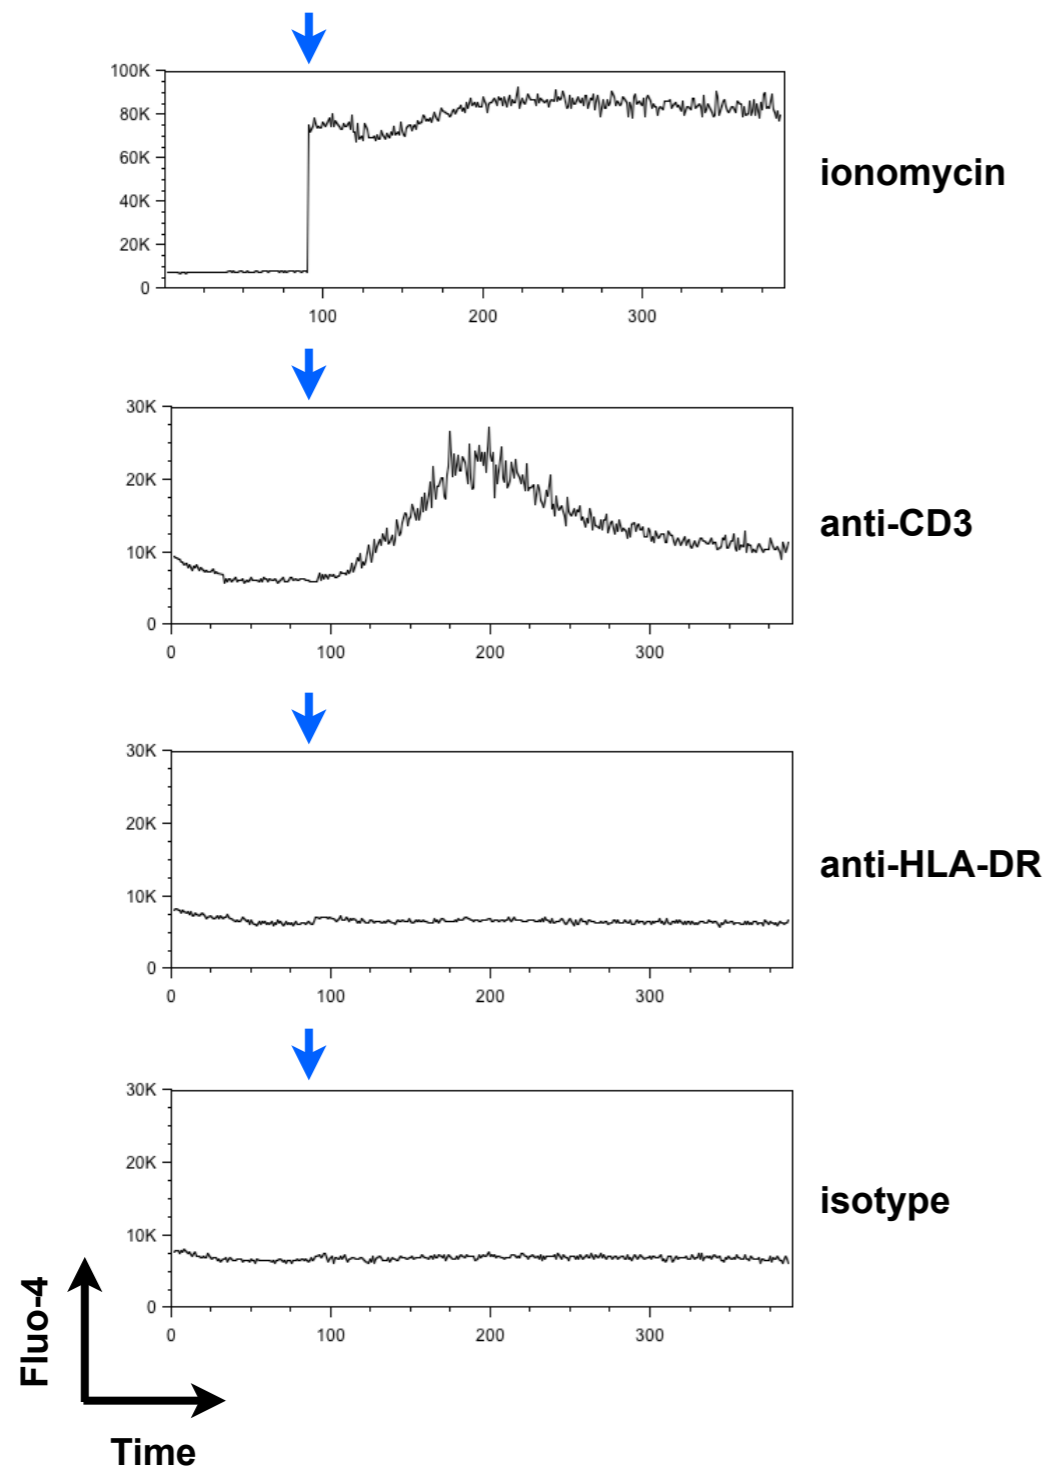

**B**

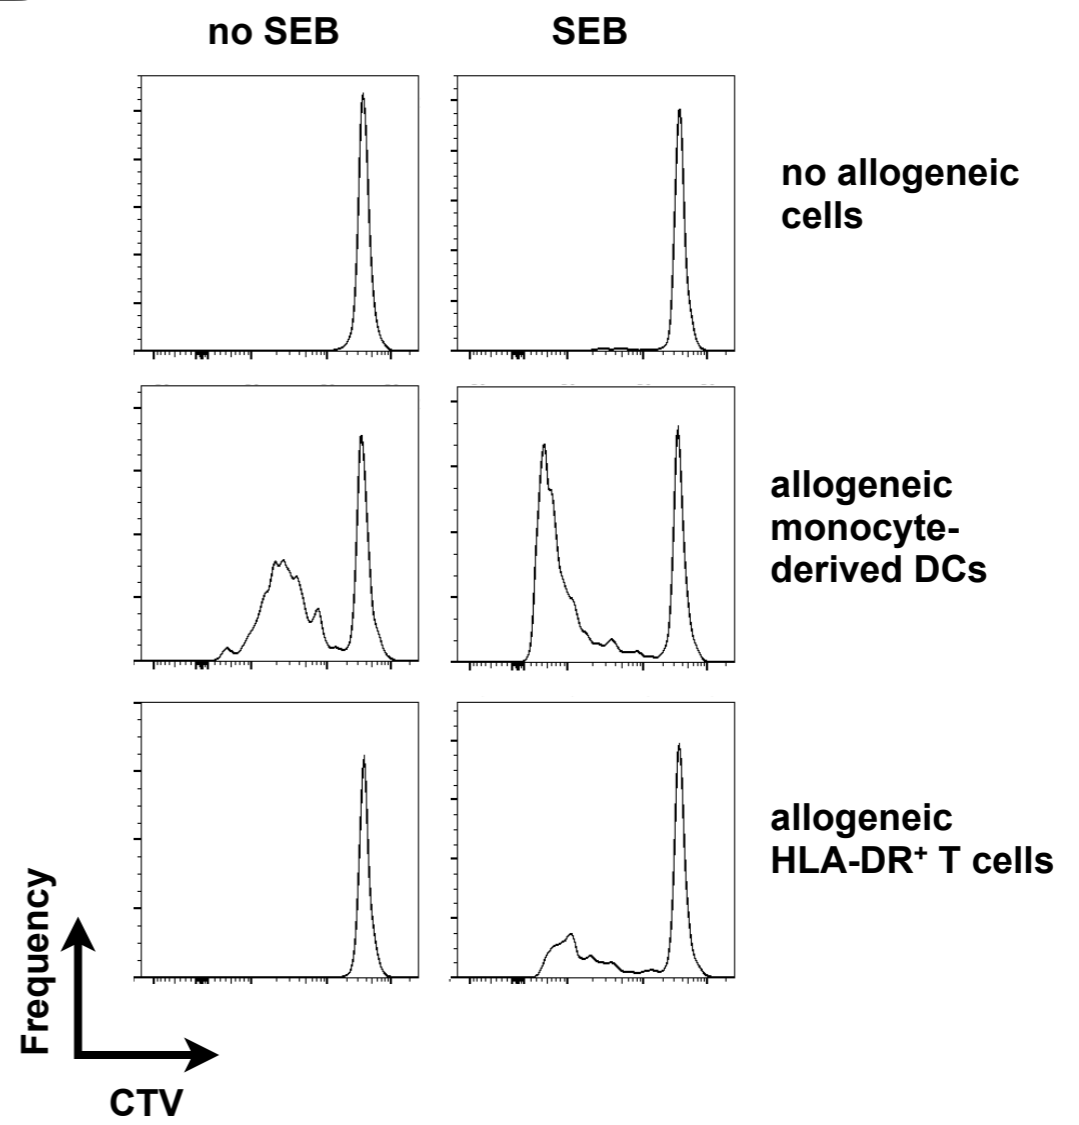

**A**
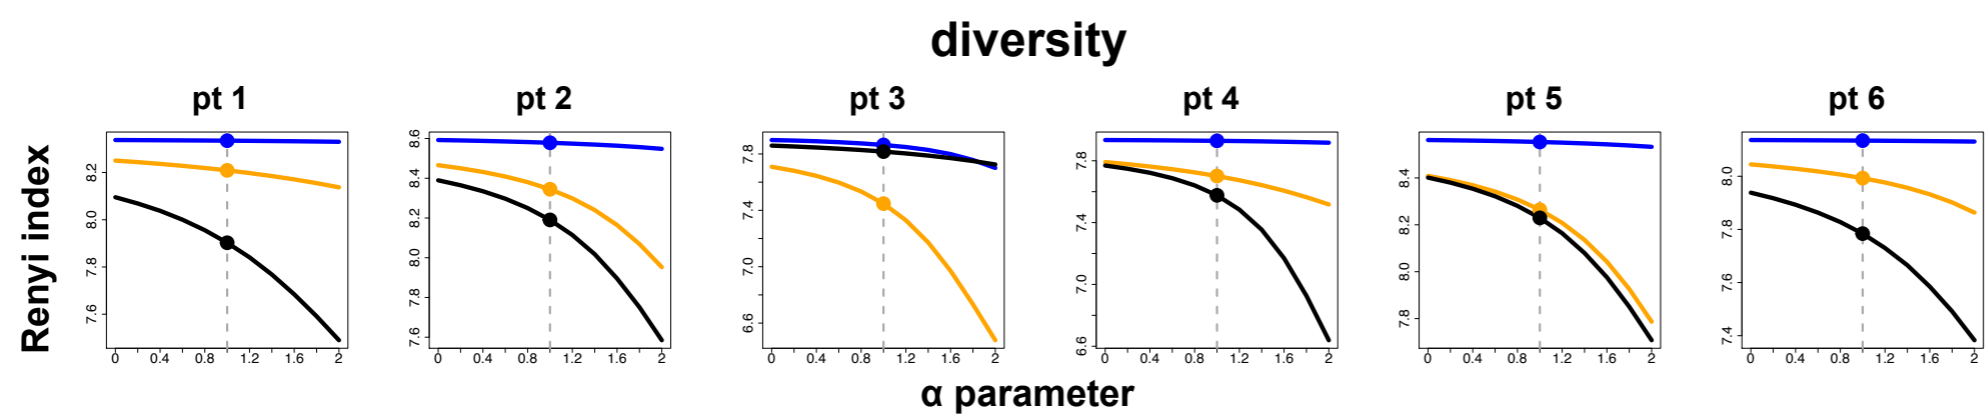
**B**
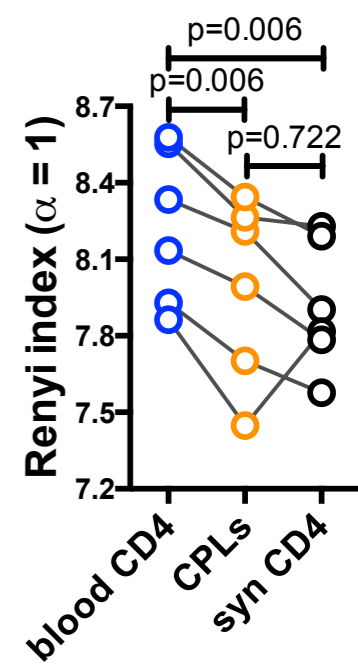
**C**
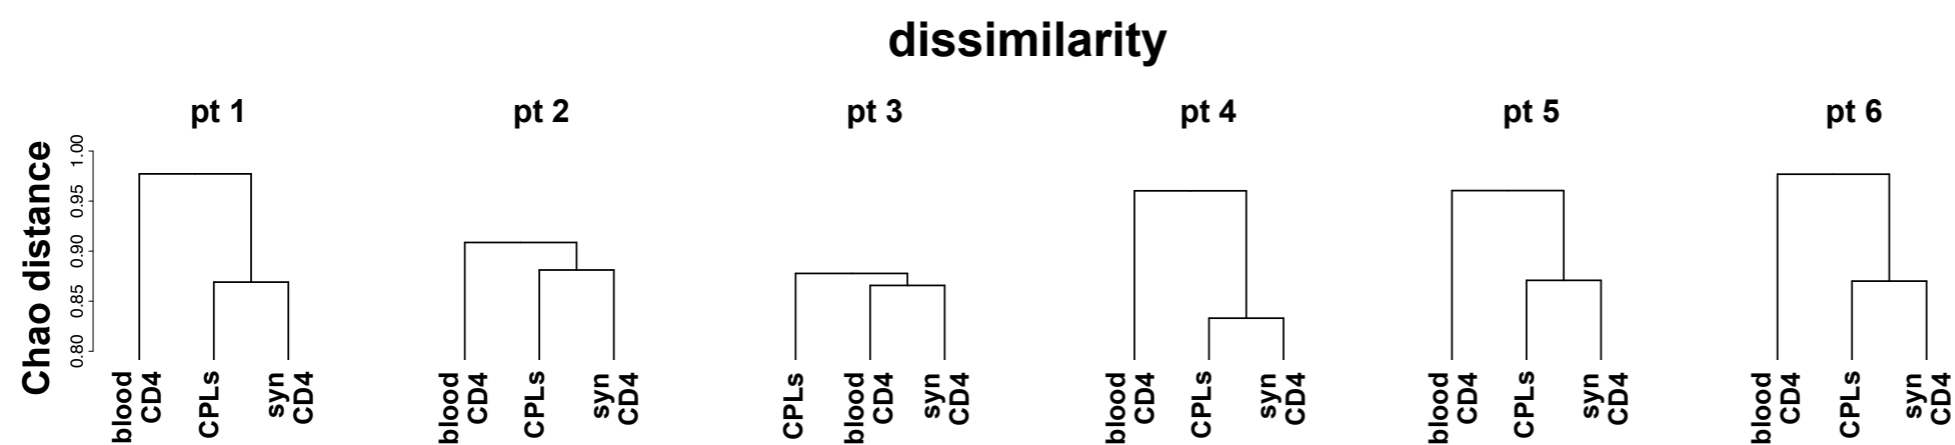
**D**
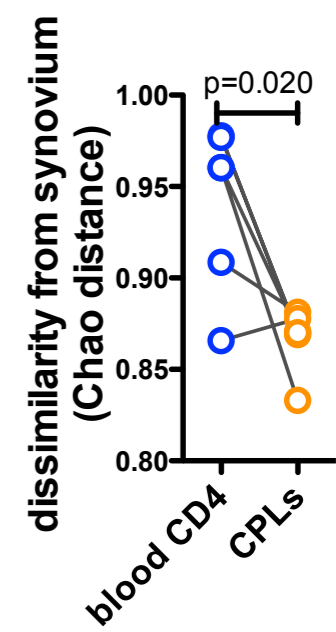
**E**
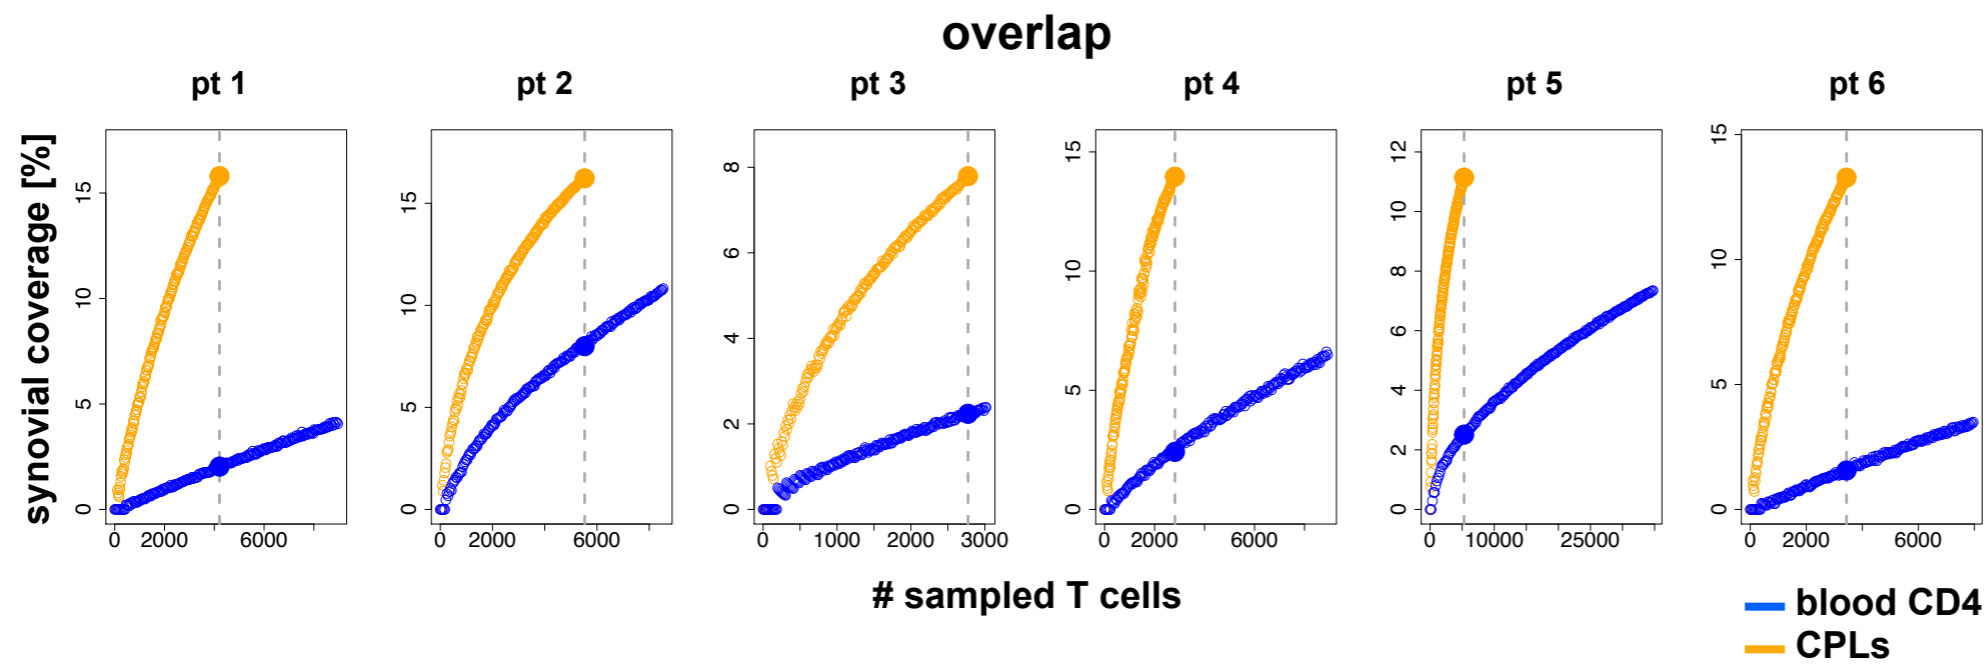
**F**
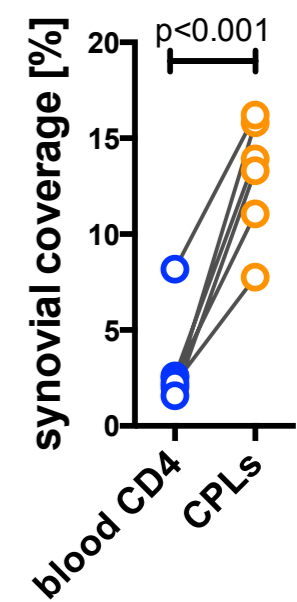
**G**
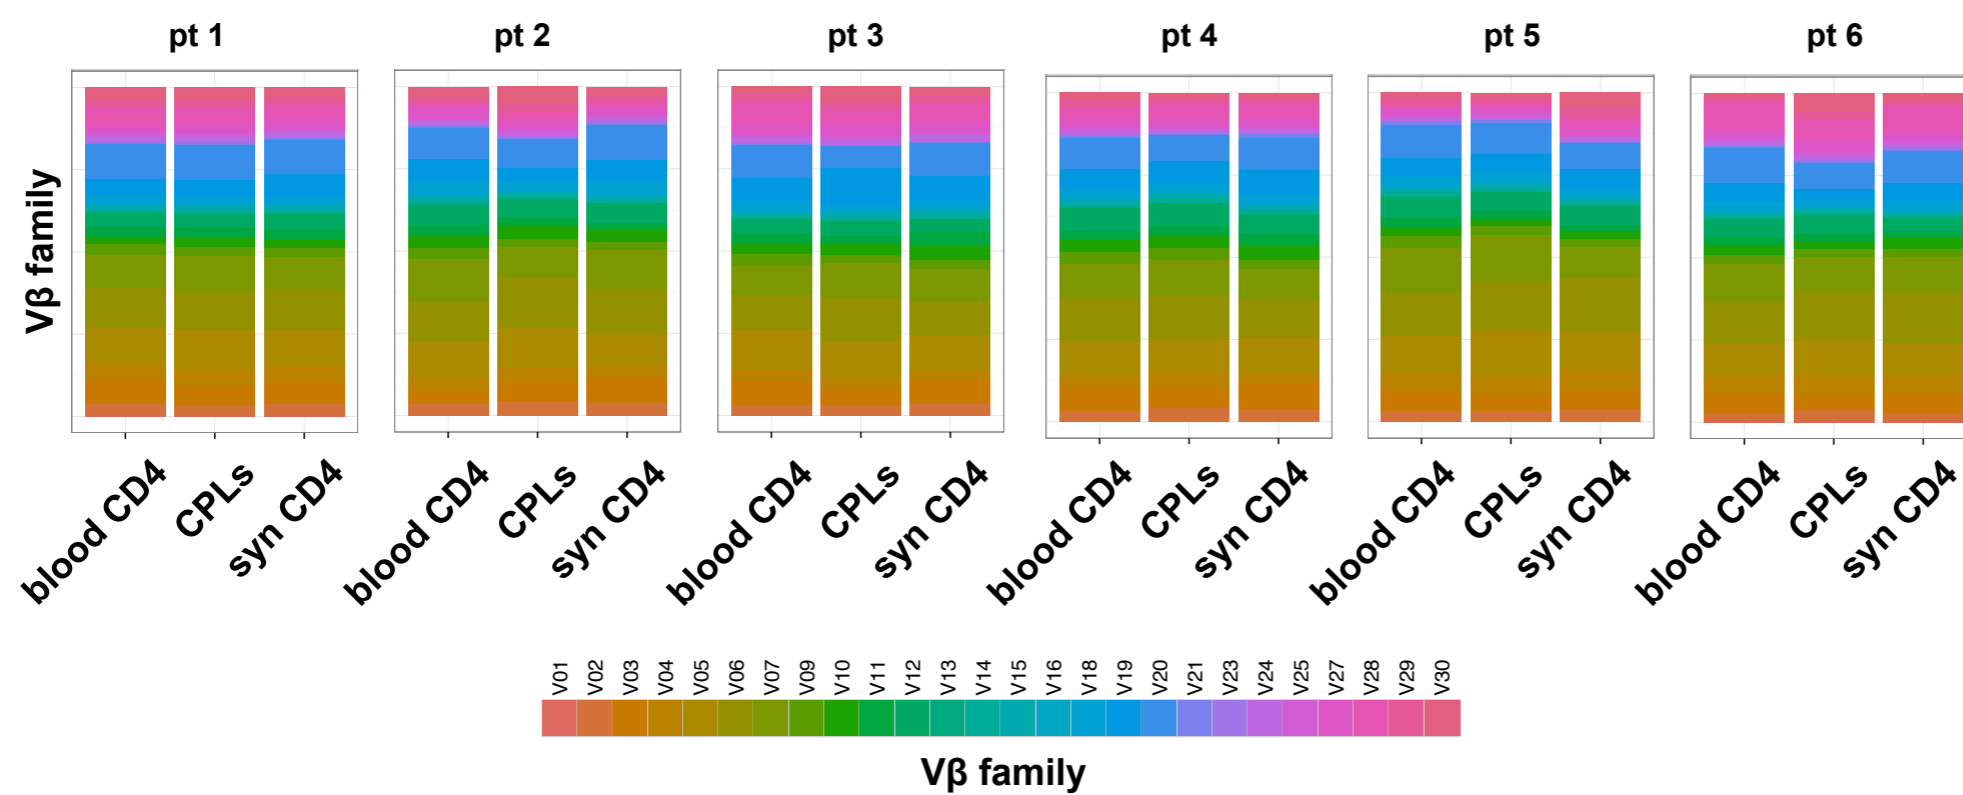

Supplement: annrheumdis-2014-206226-s2.pdf [file annrheumdis-2014-206226-s2.pdf]
